# Supplementary material
Source: HighWire-hosted journal article supplement (https://erj.ersjournals.com/content/57/2/2000337)
Supplement: inline-supplementary-material-1 [file inline-supplementary-material-1.pdf]

SUPPLEMENTARY APPENDIX

Table S1. Baseline characteristics of patients in each case series

|                                                  | France        |               | Brazil        |               | Italy         |               | Mexico        |               | United Kingdom |               | United States of America |               |
|--------------------------------------------------|---------------|---------------|---------------|---------------|---------------|---------------|---------------|---------------|----------------|---------------|--------------------------|---------------|
|                                                  | RA-ILD        | RA-noILD      | RA-ILD        | RA-noILD      | RA-ILD        | RA-noILD      | RA-ILD        | RA-noILD      | RA-ILD         | RA-noILD      | RA-ILD                   | RA-noILD      |
| No. patients                                     | 100           | 165           | 61            | 201           | 46            | 47            | 33            | 69            | 18             | 29            | 152                      | 162           |
| Female — no. (%)                                 | 56 (56.0)     | 131 (79.4)    | 43 (70.5)     | 201 (100.0)   | 27 (58.7)     | 35 (74.5)     | 24 (72.7)     | 64 (92.8)     | 10 (55.6)      | 19 (65.5)     | 82 (53.9)                | 102 (63.0)    |
| Age at inclusion — yr                            | 60 (53-68)    | 55 (46-65)    | 58 (52-66)    | 62 (55-68)    | 71 (63-74)    | 72 (62-77)    | 56 (48-65)    | 55 (44-62)    | 74 (70-78)     | 69 (64-74)    | 68 (60-74)               | 69 (61-76)    |
| RA duration — yr                                 | 10 (4-18)     | 10 (4-16)     | 14 (9-25)     | 17 (11-27)    | 16 (12-22)    | 17 (12-22)    | 10 (7-17)     | 12 (7-17)     | 8 (4-12)       | 10 (6-20)     | 12 (5-20)                | 10 (5-19)     |
| MTX exposure duration — yr                       | 4 (1-13)      | 10 (4-16)     | 8 (3-17)      | 17 (11-27)    | 9 (5-17)      | 17 (12-22)    | 7 (3-12)      | 12 (7-17)     | 5 (2-10)       | 10 (6-20)     | 6 (1-15)                 | 10 (5-19)     |
| Age at RA onset — yr                             | 54 (44-62)    | 42 (30-52)    | 50 (41-57)    | 42 (32-50)    | 54 (46-66)    | 53 (46-61)    | 49 (29-57)    | 40 (31-47)    | 70 (57-75)     | 57 (49-62)    | 59 (49-69)               | 56 (44-63)    |
| No. missing                                      | 0             | 1             | 0             | 0             | 0             | 0             | 0             | 0             | 0              | 0             | 0                        | 0             |
| Periods of MTX use at year of RA onset — no. (%) |               |               |               |               |               |               |               |               |                |               |                          |               |
| Unlikely                                         | 6 (6.0)       | 19 (11.5)     | 5 (8.2)       | 23 (11.4)     | 8 (17.4)      | 2 (4.3)       | 3 (9.1)       | 3 (4.3)       | 0 (0)          | 0 (0)         | 9 (5.9)                  | 11 (6.8)      |
| Less often                                       | 18 (18.0)     | 24 (14.5)     | 14 (23.0)     | 42 (20.9)     | 5 (10.9)      | 8 (17.0)      | 3 (9.1)       | 6 (8.7)       | 2 (11.1)       | 4 (13.8)      | 27 (17.8)                | 19 (11.7)     |
| Often                                            | 42 (42.0)     | 81 (49.1)     | 23 (37.7)     | 88 (43.8)     | 26 (56.5)     | 28 (59.6)     | 12 (36.4)     | 35 (50.7)     | 4 (22.2)       | 10 (34.5)     | 61 (40.1)                | 52 (32.1)     |
| Standard of care                                 | 34 (34.0)     | 41 (24.8)     | 19 (31.1)     | 48 (23.9)     | 7 (15.2)      | 9 (19.1)      | 15 (45.5)     | 25 (36.2)     | 12 (66.7)      | 15 (51.7)     | 55 (36.2)                | 80 (49.4)     |
| Ever smoker — no. (%)                            | 59 (59.0)     | 70 (45.2)     | 30 (50.0)     | 61 (31.3)     | 22 (51.2)     | 20 (43.5)     | 14 (42.4)     | 19 (27.5)     | 14 (77.8)      | 14 (53.8)     | 96 (64.0)                | 94 (58.0)     |
| No. missing                                      | 0             | 10            | 1             | 6             | 3             | 1             | 0             | 0             | 0              | 3             | 2                        | 0             |
| Mean tobacco exposure (SD), pack/yr              | 13.8 (17.0)   | 10.0 (21.2)   | 18.9 (28.6)   | 7.6 (18.8)    | 0.5 (2.6)     | 0.0 (0.0)     | 5.4 (10.7)    | 1.3 (3.9)     | 21.9 (17.9)    | 14.1 (19.8)   | 19.6 (22.9)              | 14.4 (20.4)   |
|                                                  | 2             | 33            | 9             | 33            | 24            | 21            | 1             | 2             | 4              | 6             | 22                       | 28            |
| Biologic ever use                                | 37 (57.8)     | 86 (55.5)     | 19 (31.1)     | 116 (57.7)    | 20 (48.8)     | 28 (66.7)     | 3 (9.1)       | 1 (1.4)       | 10 (55.6)      | 15 (51.7)     | 97 (63.8)                | 96 (59.3)     |
| No. missing                                      | 36            | 10            | 0             | 0             | 5             | 5             | 0             | 0             | 0              | 0             | 0                        | 0             |
| Methotrexate exposure                            |               |               |               |               |               |               |               |               |                |               |                          |               |
| MTX ever use — no. (%)                           | 60 (60.0)     | 137 (83.0)    | 44 (72.1)     | 194 (96.5)    | 40 (87.0)     | 47 (100.0)    | 32 (97.0)     | 68 (98.6)     | 18 (100.0)     | 29 (100.0)    | 113 (74.3)               | 147 (90.7)    |
| MTX cumulative dose — g                          | 0.1 (0.0-3.1) | 2.2 (0.2-5.5) | 2.1 (0.0-5.2) | 4.8 (1.4-9.6) | 0.7 (0.0-1.3) | 2.9 (0.6-6.3) | 1.9 (1.0-3.4) | 5.2 (3.3-7.2) | 4.5 (2.0-7.3)  | 5.2 (3.8-6.8) | 2.1 (0.0-6.7)            | 3.9 (0.7-8.3) |
| No. missing                                      | 19            | 43            | 20            | 64            | 5             | 0             | 0             | 0             | 0              | 0             | 42                       | 28            |
| RA autoimmunity                                  |               |               |               |               |               |               |               |               |                |               |                          |               |
| ACPA-positive — no. (%)                          | 83 (85.6)     | 140 (88.1)    | 38 (76.0)     | 140 (75.3)    | 34 (73.9)     | 36 (76.6)     | 15 (75.0)     | 44 (100.0)    | 10 (71.4)      | 16 (66.7)     | 107 (85.6)               | 110 (78.0)    |
| No. missing                                      | 3             | 6             | 11            | 15            | 0             | 0             | 13            | 25            | 4              | 5             | 27                       | 21            |
| RF-positive — no. (%)                            | 71 (77.2)     | 120 (77.4)    | 43 (86.0)     | 113 (74.3)    | 38 (82.6)     | 39 (83.0)     | 22 (95.7)     | 56 (90.3)     | 18 (100.0)     | 24 (85.7)     | 108 (82.4)               | 114 (74.0)    |
| No. missing                                      | 8             | 10            | 11            | 49            | 0             | 0             | 10            | 7             | 0              | 1             | 21                       | 8             |
| UIP or possible UIP — no. (%)                    | 47 (52.8)     |               | 28 (45.9)     |               | 18 (39.1)     |               | 12 (36.4)     |               | 10 (55.6)      |               | 65 (42.8)                |               |
| No. missing                                      | 11            |               | 0             |               | 0             |               | 0             |               | 0              |               | 0                        |               |
| Pulmonary function testing                       |               |               |               |               |               |               |               |               |                |               |                          |               |
| FVC — % predicted                                | 88 (66-102)   |               | NA            |               | 84 (74-91)    |               | 60 (50-85)    |               | 93 (84-113)    |               | 74 (61-87)               |               |
| No. missing                                      | 35            |               | NA            |               | 22            |               | 1             |               | 2              |               | 12                       |               |
| DLCO — % predicted                               | 59 (50-70)    |               | NA            |               | 65 (54-68)    |               | 38 (21-72)    |               | 56 (46-68)     |               | 53 (40-68)               |               |
| No. missing                                      | 40            |               | NA            |               | 19            |               | 19            |               | 2              |               | 19                       |               |
| TLC — % predicted                                | 81 (69-94)    |               | NA            |               | 77 (65-89)    |               | 73 (62-83)    |               | 83 (76-87)     |               | 76 (67-86)               |               |
| No. missing                                      | 52            |               | NA            |               | 39            |               | 28            |               | 2              |               | 46                       |               |

RA: rheumatoid arthritis, ILD: interstitial lung disease, RA-ILD: patients with rheumatoid arthritis associated interstitial lung disease, RA-noILD: rheumatoid arthritis patients without interstitial lung disease, MTX: methotrexate, ACPA: anti-citrullinated protein antibody, RF: rheumatoid factor, HRCT: high-resolution computed tomography, UIP: usual interstitial pneumonia, FVC: forced vital capacity, DL<sub>CO</sub>: diffusion capacity of carbon monoxide, TLC: total lung capacity, NA: not assessed. Values are median (interquartile range) or else if indicated.

**Table S2. Sensitivity analyses of the association between methotrexate ever use and interstitial lung disease in patients with rheumatoid arthritis.**

| Sensitivity analysis                                | Discovery                  | Pooled replication         | Combined                   |
|-----------------------------------------------------|----------------------------|----------------------------|----------------------------|
|                                                     | OR <sub>adj</sub> (95% CI) | OR <sub>adj</sub> (95% CI) | OR <sub>adj</sub> (95% CI) |
| One-stage analysis with random case series effects  | 0.46 (0.24 to 0.90)        | 0.43 (0.21 to 0.84)        | 0.44 (0.28 to 0.70)        |
| Removing replication samples with too few unexposed | 0.46 (0.24 to 0.90)        | 0.39 (0.19 to 0.81)        | 0.43 (0.26 to 0.70)        |
| Complete cases analysis                             | 0.41 (0.19 to 0.88)        | 0.41 (0.20 to 0.81)        | 0.41 (0.24 to 0.68)        |

Odds ratios (OR<sub>adj</sub>) are adjusted for age at RA onset, sex, ever smoking, biologic ever use, MTX exposure duration and periods of MTX use at year of RA onset.

To add further sensitivity analyses, we considered that all missing biologic use data would be either « no » or « yes » in the discovery sample, which are rather extreme assumptions. This corresponded to proportions of biologic use of 37% or 73% for RA-ILD, respectively, and 52.1% or 58.2% for RA-noILD, respectively. In the first case, the odds ratio in the discovery sample was increased to 0.52 (95%CI 0.27 to 1.00), and in the second case it was 0.43 (0.22 to 0.84). The combined odds ratios were 0.45 (0.28 to 0.74) and 0.41 (0.25 to 0.67), respectively.

Table S3. Effect of methotrexate ever use on the delay of onset of interstitial lung disease among patients with rheumatoid arthritis.

| Sample             | MTX never use | MTX ever use | Adjusted Mean       |                         |
|--------------------|---------------|--------------|---------------------|-------------------------|
|                    | Mean (SD)     | Mean (SD)    | Difference (95% CI) | <i>P</i> <sub>adj</sub> |
| Discovery          | 3.7 (7.1)     | 10.7 (9.3)   | 3.5 (1.4–5.6)       | 0.001                   |
| Pooled replication | 4.2 (7.6)     | 11.5 (10.7)  | 3.5 (2.2–4.8)*      | <0.001                  |
| Combined           | 4.0 (7.4)     | 11.4 (10.4)  | 3.6 (2.6–4.7)*      | <0.001                  |

MTX: methotrexate. Mean differences and P-values are adjusted for age at RA onset, sex, ever smoking, biologic ever use, MTX exposure duration and periods of MTX use at year of RA onset, and obtained by a single-stage model with a random effect for case series origin (\*), pooled over multiply imputed datasets. \* UK excluded from the Pooled validation and Combined analyses.

## REFERENCES

1. Weinblatt ME, Coblyn JS, Fox DA, Fraser PA, Holdsworth DE, Glass DN, Trentham DE. Efficacy of low-dose methotrexate in rheumatoid arthritis. *The New England journal of medicine* 1985; 312(13): 818-822.
2. Kwoh CK, Simms RW, Anderson CJ, Erlandson DM, Green JM, Moncur C, O'Dell JR, Partridge AJ, Roberts WN, Robbins ML, Yood RA, Liang MH. Guidelines for the management of rheumatoid arthritis: American College of Rheumatology Ad Hoc Committee on Clinical Guidelines. *Arthritis and rheumatism* 1996; 39(5): 713-722.
3. Weinblatt ME. Efficacy of methotrexate in rheumatoid arthritis. *Br J Rheumatol* 1995; 34 Suppl 2: 43-48.
4. Weinblatt ME. Methotrexate for chronic diseases in adults. *The New England journal of medicine* 1995; 332(5): 330-331.
5. Saag KG, Teng GG, Patkar NM, Anuntiyo J, Finney C, Curtis JR, Paulus HE, Mudano A, Pisu M, Elkins-Melton M, Outman R, Allison JJ, Suarez Almazor M, Bridges SL, Jr., Chatham WW, Hochberg M, MacLean C, Mikuls T, Moreland LW, O'Dell J, Turkiewicz AM, Furst DE, American College of R. American College of Rheumatology 2008 recommendations for the use of nonbiologic and biologic disease-modifying antirheumatic drugs in rheumatoid arthritis. *Arthritis and rheumatism* 2008; 59(6): 762-784.
