# Supplementary material
Source: HighWire-hosted journal article supplement (https://erj.ersjournals.com/content/57/2/2000337)
Supplement: inline-supplementary-material-2 [file inline-supplementary-material-2.pdf]

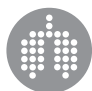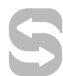

SHAREABLE PDF

# Methotrexate and rheumatoid arthritis associated interstitial lung disease

Pierre-Antoine Juge<sup>1,38</sup>, Joyce S. Lee<sup>2,38</sup>, Jessica Lau<sup>3,38</sup>, Leticia Kawano-Dourado<sup>4</sup>, Jorge Rojas Serrano<sup>5</sup>, Marco Sebastiani<sup>6</sup>, Gouri Koduri<sup>7</sup>, Eric Matteson<sup>8,9</sup>, Karina Bonfiglioli<sup>10</sup>, Marcio Sawamura<sup>11</sup>, Ronaldo Kairalla<sup>4</sup>, Lorenzo Cavagna<sup>12</sup>, Emanuele Bozzalla Cassione<sup>12</sup>, Andreina Manfredi<sup>6</sup>, Mayra Mejia<sup>5</sup>, Pedro Rodríguez-Henriquez<sup>13</sup>, Montserrat I. González-Pérez<sup>5</sup>, Ramcés Falfán-Valencia<sup>14</sup>, Ivette Buendia-Roldán<sup>15</sup>, Gloria Pérez-Rubio<sup>14</sup>, Esther Epstein<sup>1</sup>, Steven Gazal<sup>16,17</sup>, Raphaël Borie<sup>18</sup>, Sébastien Ottaviani<sup>1</sup>, Caroline Kannengiesser<sup>19</sup>, Benoît Wallaert<sup>20</sup>, Yurdagul Uzunhan<sup>21</sup>, Hilario Nunes<sup>21</sup>, Dominique Valeyre<sup>21</sup>, Nathalie Saidenberg-Kermanac'h<sup>22</sup>, Marie-Christophe Boissier<sup>22</sup>, Lidwine Wemeau-Stervinou<sup>20</sup>, René-Marc Flipo<sup>23</sup>, Sylvain Marchand-Adam<sup>24</sup>, Pascal Richette<sup>25,26</sup>, Yannick Allanore<sup>27,28</sup>, Claire Dromer<sup>29</sup>, Marie-Elise Truchetet<sup>30</sup>, Christophe Richez<sup>30</sup>, Thierry Schaefferbeke<sup>30</sup>, Huguette Lioté<sup>31</sup>, Gabriel Thabut<sup>32</sup>, Kevin D. Deane<sup>2</sup>, Joshua J. Solomon<sup>33</sup>, Tracy Doyle<sup>34</sup>, Jay H. Ryu<sup>3</sup>, Ivan Rosas<sup>34</sup>, V. Michael Holers<sup>2</sup>, Catherine Boileau<sup>19</sup>, Marie-Pierre Debray<sup>35</sup>, Raphaël Porcher<sup>36,37</sup>, David A. Schwartz<sup>2</sup>, Robert Vassallo<sup>3</sup>, Bruno Crestani<sup>19,39</sup> and Philippe Dieudé<sup>1,39</sup>

**Affiliations:** <sup>1</sup>Dept of Rheumatology, DMU Locomotion, INSERM UMR1152, Hôpital Bichat-Claude Bernard, APHP, Université de Paris, Paris, France. <sup>2</sup>Dept of Medicine, University of Colorado School of Medicine, Aurora, CO, USA. <sup>3</sup>Division of Pulmonary and Critical Care Medicine, Mayo Clinic College of Medicine and Science, Rochester, MN, USA. <sup>4</sup>Pulmonary Division, Heart Institute (InCor) Medical School of the University of São Paulo, São Paulo, Brazil. <sup>5</sup>Unidad de Enfermedades del Intersticio Pulmonar y Reumatología, Instituto Nacional de Enfermedades Respiratorias, Ismael Cosío Villegas, Ciudad de México, México. <sup>6</sup>Rheumatology Unit, Azienda Ospedaliera Policlinico di Modena, University of Modena and Reggio Emilia, Modena, Italy. <sup>7</sup>Rheumatology Dept, Southend University Hospital NHSFT, Southend-on-Sea, UK. <sup>8</sup>Division of Rheumatology, Mayo Clinic College of Medicine and Science, Rochester, MN, USA. <sup>9</sup>Dept of Health Sciences Research, Mayo Clinic College of Medicine and Science, Rochester, MN, USA. <sup>10</sup>Division of Rheumatology, Medical School of the University of São Paulo, São Paulo, Brazil. <sup>11</sup>Division of Radiology, Medical School of the University of São Paulo, São Paulo, Brazil. <sup>12</sup>University and IRCCS Policlinico S. Matteo Foundation of Pavia, Pavia, Italy. <sup>13</sup>Departamento de Reumatología, Hospital General Dr. Manuel Gea González, Ciudad de México, México. <sup>14</sup>HLA Laboratory, Instituto Nacional de Enfermedades Respiratorias, Ismael Cosío Villegas, Ciudad de México, México. <sup>15</sup>Research Direction, Instituto Nacional de Enfermedades Respiratorias Ismael Cosío Villegas, Ciudad de México, México. <sup>16</sup>Dept of Epidemiology, Harvard T.H. Chan School of Public Health, Boston, MA, USA. <sup>17</sup>Program in Medical and Population Genetics, Broad Institute of MIT and Harvard, Cambridge, MA, USA. <sup>18</sup>Dept of Pulmonology, Centre de Référence des Maladies Pulmonaires Rares, INSERM UMR1152, DHU APOLLO, Hôpital Bichat-Claude Bernard, APHP, Université de Paris, Paris, France. <sup>19</sup>Dept of Genetics, INSERM UMR1152, Hôpital Bichat-Claude Bernard, APHP, Université de Paris, Paris, France. <sup>20</sup>CHRU de Lille, Service de Pneumologie et Immuno-Allergologie, Centre de compétence des maladies pulmonaires rares, FHU IMMINENT, Lille, France. <sup>21</sup>Dept of Pulmonology, Centre de Référence des Maladies Pulmonaires Rares, Inserm 1272, Hôpital Avicenne, APHP, Université Paris 13, Bobigny, France. <sup>22</sup>Dept of Rheumatology, Hôpital Avicenne, APHP, Bobigny, France. <sup>23</sup>CHU de Lille, Service de Rhumatologie, Lille, France. <sup>24</sup>Dept of Pulmonology, CHRU Tours, Tours, France. <sup>25</sup>AP-HP, Hôpital Lariboisière, Service de Rhumatologie, DMU Locomotion, Université de Paris, Paris, France. <sup>26</sup>INSERM, UMR\_1132, Paris, France. <sup>27</sup>APHP, Hôpital Cochin, Service de Rhumatologie A, Université de Paris, Paris, France. <sup>28</sup>INSERM, U1016, UMR\_8104, Paris, France. <sup>29</sup>Service de Pneumologie, Centre Hospitalier Universitaire de Bordeaux, Bordeaux, France. <sup>30</sup>CHU de Bordeaux, Service de Rhumatologie, Bordeaux, France. <sup>31</sup>APHP, Hôpital Tenon, Service de Pneumologie, Paris, France. <sup>32</sup>APHP, Hôpital Bichat, INSERM 1152, Service de Pneumologie B, DHU FIRE, Université de Paris, Paris, France. <sup>33</sup>Dept of Medicine, National Jewish Health, Denver, CO, USA. <sup>34</sup>Dept of Medicine, Brigham and Women's Hospital, Boston, MA, USA. <sup>35</sup>Dept of Radiology, INSERM UMR1152, Hôpital Bichat-Claude Bernard, APHP, Université de Paris, Paris, France. <sup>36</sup>Université de Paris, CRESS, INSERM, INRA, Paris, France. <sup>37</sup>Centre d'Epidémiologie Clinique, AP-HP, Hôpital Hôtel-Dieu, Paris, France. <sup>38</sup>These authors contributed equally. <sup>39</sup>These authors contributed equally.

**Correspondence:** Philippe Dieudé, Rheumatology Dept, Bichat Hospital, APHP, Paris Diderot University, 46, rue Henri Huchard 75018, Paris, France. E-mail: philippe.dieude@aphp.fr

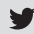

@ERSpublications

**This multi-ethnic case-control study showed that methotrexate use is not associated with an increased risk of interstitial lung disease in patients with rheumatoid arthritis** <https://bit.ly/3fC8skd>

**Cite this article as:** Juge P-A, Lee JS, Lau J, *et al.* Methotrexate and rheumatoid arthritis associated interstitial lung disease. *Eur Respir J* 2021; 57: 2000337 [<https://doi.org/10.1183/13993003.00337-2020>].

This single-page version can be shared freely online.

#### ABSTRACT

**Question addressed by the study:** Methotrexate (MTX) is a key anchor drug for rheumatoid arthritis (RA) management. Fibrotic interstitial lung disease (ILD) is a common complication of RA. Whether MTX exposure increases the risk of ILD in patients with RA is disputed. We aimed to evaluate the association of prior MTX use with development of RA-ILD.

**Methods:** Through a case-control study design with discovery and international replication samples, we examined the association of MTX exposure with ILD in 410 patients with chronic fibrotic ILD associated with RA (RA-ILD) and 673 patients with RA without ILD. Estimates were pooled over the different samples using meta-analysis techniques.

**Results:** Analysis of the discovery sample revealed an inverse relationship between MTX exposure and RA-ILD (adjusted OR 0.46, 95% CI 0.24–0.90;  $p=0.022$ ), which was confirmed in the replication samples (pooled adjusted OR 0.39, 95% CI 0.19–0.79;  $p=0.009$ ). The combined estimate using both the derivation and validation samples revealed an adjusted OR of 0.43 (95% CI 0.26–0.69;  $p=0.0006$ ). MTX ever-users were less frequent among patients with RA-ILD compared to those without ILD, irrespective of chest high-resolution computed tomography pattern. In patients with RA-ILD, ILD detection was significantly delayed in MTX ever-users compared to never-users ( $11.4\pm 10.4$  years and  $4.0\pm 7.4$  years, respectively;  $p<0.001$ ).

**Answer to the question:** Our results suggest that MTX use is not associated with an increased risk of RA-ILD in patients with RA, and that ILD was detected later in MTX-treated patients.
